# Supplementary material for: Changing POU dimerization preferences converts Oct6 into a pluripotency inducer
Source: PubMed Central journal article supplement (PMC5286379; doi:10.15252/embr.201642958), 2016-12-22
Supplement: EMBR-18-319-s001.pdf [file EMBR-18-319-s001.pdf]

## APPENDIX

### TABLE OF CONTENTS

| <b>Information</b>                                                                                                                 | <b>Page</b> |
|------------------------------------------------------------------------------------------------------------------------------------|-------------|
| Appendix Supplementary <b>Table S1</b><br><b>EMSA OLIGONUCLEOTIDES</b>                                                             | 2           |
| Appendix Supplementary <b>Table S2</b><br><b>ENERGY MINIMIZATION PROCEDURE</b>                                                     | 3           |
| Appendix Supplementary <b>Table S3</b><br><b>EQUILIBRATION PROCEDURE FOR MOLECULAR</b><br><b>DYNAMICS SIMULATIONS</b>              | 4           |
| Appendix Supplementary <b>Table S4</b><br><b>SEQUENCES OF OLIGONUCLEOTIDES FOR</b><br><b>CLONING AND SITE-DIRECTED MUTAGENESIS</b> | 5           |
| Appendix Supplementary <b>Table S5</b><br><b>SEQUENCES OF PRIMERS FOR GENOTYPING</b><br><b>OR qRT-PCR</b>                          | 6           |
| Appendix <b>Figure Legends</b>                                                                                                     | 7           |
| Appendix <b>Fig. S1</b>                                                                                                            | 8           |
| Appendix <b>Fig. S2</b>                                                                                                            | 9           |

**APPENDIX SUPPLEMENTARY TABLE S1:**

**EMSA OLIGONUCLEOTIDES**

| <b>DNA element</b>              | <b>Sequence</b>              |
|---------------------------------|------------------------------|
| <i><b>MORE<br/>(OctOct)</b></i> | TCCTCATGAATATTCATGAGGA       |
| <i><b>SoxOct</b></i>            | CCATGGACATTGTAATGCAAAGAAGCTG |

**APPENDIX SUPPLEMENTARY TABLE S2:**

**ENERGY MINIMIZATION PROCEDURE**

| <b>Step (no. of minimization steps, no. of steepest descent, no. of conjugate gradient steps)</b> | <b>Positional restrains<br/><math>k_1 =</math> force constant</b>           | <b>Distance restraints<br/>(to preserve hydrogen bonds<sup>#</sup> and hydrophobic<sup>##</sup> interactions)<br/><math>k_2 =</math> force constant</b> |
|---------------------------------------------------------------------------------------------------|-----------------------------------------------------------------------------|---------------------------------------------------------------------------------------------------------------------------------------------------------|
| 1 (5000, 100, 4900)                                                                               | protein and DNA heavy atoms<br>$k_1 = 25 \text{ kcal/mol} \cdot \text{Å}^2$ | -                                                                                                                                                       |
| 2 (5000, 100, 4900)                                                                               | protein and DNA heavy atoms<br>$k_1 = 10 \text{ kcal/mol} \cdot \text{Å}^2$ | -                                                                                                                                                       |
| 3 (5000, 100, 4900)                                                                               | protein and DNA heavy atoms<br>$k_1 = 5 \text{ kcal/mol} \cdot \text{Å}^2$  | -                                                                                                                                                       |
| 4 (5000, 100, 4900)                                                                               | protein and DNA backbone<br>$k_1 = 5 \text{ kcal/mol} \cdot \text{Å}^2$     | Watson Crick base pairs and protein-DNA (sidechain-base) interactions<br>$k_2 = 20 \text{ kcal/mol} \cdot \text{Å}^2$                                   |
| 5 (5000, 100, 4900)                                                                               | protein and DNA backbone<br>$k_1 = 1 \text{ kcal/mol} \cdot \text{Å}^2$     | $k_2 = 20 \text{ kcal/mol} \cdot \text{Å}^2$                                                                                                            |
| 6 (5000, 100, 4900)                                                                               | protein and DNA backbone<br>$k_1 = 0.5 \text{ kcal/mol} \cdot \text{Å}^2$   | $k_2 = 20 \text{ kcal/mol} \cdot \text{Å}^2$                                                                                                            |
| 7 (5000, 100, 4900)                                                                               | protein and DNA backbone<br>$k_1 = 0.1 \text{ kcal/mol} \cdot \text{Å}^2$   | $k_2 = 20 \text{ kcal/mol} \cdot \text{Å}^2$                                                                                                            |
| 8 (5000, 100, 4900)                                                                               | protein and DNA backbone<br>$k_1 = 0.05 \text{ kcal/mol} \cdot \text{Å}^2$  | $k_2 = 20 \text{ kcal/mol} \cdot \text{Å}^2$                                                                                                            |
| 9 (5000, 100, 4900)                                                                               | protein and DNA backbone<br>$k_1 = 0.01 \text{ kcal/mol} \cdot \text{Å}^2$  | $k_2 = 20 \text{ kcal/mol} \cdot \text{Å}^2$                                                                                                            |
| 10 (5000, 100, 4900)                                                                              | -                                                                           | $k_2 = 20 \text{ kcal/mol} \cdot \text{Å}^2$                                                                                                            |
| 11 (5000, 100, 4900)                                                                              | -                                                                           | -                                                                                                                                                       |

<sup>#</sup> for hydrogen bonds, the donor acceptor distance threshold was 3.0

<sup>##</sup> for hydrophobic interactions the distance threshold was 4.0 Å

**APPENDIX SUPPLEMENTARY TABLE S3:**

**EQUILIBRATION PROCEDURE FOR MOLECULAR DYNAMICS SIMULATIONS**

| <b>Step<br/>(time, ensemble,<br/>timestep)</b> | <b>T, Langevin damping<br/>coefficient<br/>P, Nose Hoover<br/>Langevin piston<br/>period and decay</b> | <b>Positional restrains<br/><math>k_1 =</math> force constant</b>                                                     | <b>Distance restraints<br/>(to preserve hydrogen bonds<sup>#</sup> and<br/>hydrophobic<sup>##</sup> interactions)<br/><math>k_2 =</math> force constant</b> |
|------------------------------------------------|--------------------------------------------------------------------------------------------------------|-----------------------------------------------------------------------------------------------------------------------|-------------------------------------------------------------------------------------------------------------------------------------------------------------|
| 1 (150 ps, NVT, 1 fs)                          | 20-300 K, 5 ps <sup>-1</sup> (steps<br>of 5 ps and 10 K)<br>-                                          | protein and DNA heavy<br>atoms<br>$k_1 = 25 \text{ kcal/mol} \cdot \text{Å}^2$                                        | -                                                                                                                                                           |
| 2 (150 ps, NPT, 1 fs)                          | 300 K, 1 ps-1<br>1 atm, 100 fs, 50 fs                                                                  | $k_1 = 10 \text{ kcal/mol} \cdot \text{Å}^2$                                                                          | -                                                                                                                                                           |
| 3 (250 ps, NPT, 1 fs)                          | 300 K, 1 ps-1<br>1 atm, 100 fs, 50 fs                                                                  | protein structured<br>regions (linker<br>excluded) and DNA<br>$k_1 = 5 \text{ kcal/mol} \cdot \text{Å}^2$             | -                                                                                                                                                           |
| 4 (250 ps, NPT, 1 fs)                          | 300 K, 1 ps-1<br>1 atm, 100 fs, 50 fs                                                                  | $k_1 = 1 \text{ kcal/mol} \cdot \text{Å}^2$                                                                           | -                                                                                                                                                           |
| 5 (250 ps, NPT, 1 fs)                          | 300 K, 1 ps-1<br>1 atm, 100 fs, 50 fs                                                                  | Protein structured<br>regions (linker<br>excluded) and DNA<br>backbone<br>$k_1 = 1 \text{ kcal/mol} \cdot \text{Å}^2$ | Watson Crick base pairs and<br>protein-DNA (sidechain-base)<br>interactions<br>$k_2 = 25 \text{ kcal/mol} \cdot \text{Å}^2$                                 |
| 6 (250 ps, NPT, 1 fs)                          | 300 K, 1 ps-1<br>1 atm, 100 fs, 50 fs                                                                  | $k_1 = 1 \text{ kcal/mol} \cdot \text{Å}^2$                                                                           | $k_2 = 10 \text{ kcal/mol} \cdot \text{Å}^2$                                                                                                                |
| 7 (250 ps, NPT, 1 fs)                          | 300 K, 1 ps-1<br>1 atm, 100 fs, 50 fs                                                                  | $K_1 = 1 \text{ kcal/mol} \cdot \text{Å}^2$                                                                           | $k_2 = 5 \text{ kcal/mol} \cdot \text{Å}^2$                                                                                                                 |
| 8 (250 ps, NPT, 1 fs)                          | 300 K, 1 ps-1<br>1 atm, 100 fs, 50 fs                                                                  | -                                                                                                                     | $k_2 = 1 \text{ kcal/mol} \cdot \text{Å}^2$                                                                                                                 |
| 9 (250 ps, NPT, 1 fs)                          | 300 K, 1 ps-1<br>1 atm, 100 fs, 50 fs                                                                  | -                                                                                                                     | $k_2 = 0.5 \text{ kcal/mol} \cdot \text{Å}^2$                                                                                                               |
| 10 (250 ps, NPT, 1 fs)                         | 300 K, 1 ps-1<br>1 atm, 100 fs, 50 fs                                                                  | -                                                                                                                     | $k_2 = 0.1 \text{ kcal/mol} \cdot \text{Å}^2$                                                                                                               |
| 11 (250 ps, NPT, 1 fs)                         | 300 K, 1 ps-1<br>1 atm, 100 fs, 50 fs                                                                  | -                                                                                                                     | $k_2 = 0.05 \text{ kcal/mol} \cdot \text{Å}^2$                                                                                                              |
| 12 (250 ps, NPT, 1 fs)                         | 300 K, 1 ps-1<br>1 atm, 100 fs, 50 fs                                                                  | -                                                                                                                     | $k_2 = 0.01 \text{ kcal/mol} \cdot \text{Å}^2$                                                                                                              |
| 13 (1 ns, NPT, 1 fs)                           | 300 K, 1 ps-1<br>1 atm, 100 fs, 50 fs                                                                  | -                                                                                                                     | -                                                                                                                                                           |
| 14 (1.5 ns, NPT, 1.5 fs)                       | 300 K, 1 ps-1<br>1 atm, 200 fs, 100 fs                                                                 | -                                                                                                                     | -                                                                                                                                                           |
| 15 (5 ns, NPT, 2 fs)                           | 300 K, 1 ps-1<br>1 atm, 200 fs, 100 fs                                                                 | -                                                                                                                     | -                                                                                                                                                           |

<sup>#</sup> for hydrogen bonds, the donor acceptor distance threshold was 3.0

<sup>##</sup> for hydrophobic interactions the distance threshold was 4.0 Å

**APPENDIX SUPPLEMENTARY TABLE S4:**

**SEQUENCES OF OLIGONUCLEOTIDES FOR CLONING AND SITE-DIRECTED  
MUTAGENESIS**

| <b>Primer name</b>    | <b>Sequence 5'→3'</b>                                                         |
|-----------------------|-------------------------------------------------------------------------------|
| <b>Oct4-151M_F</b>    | GGCGCCAGAAGGGCAAAAGAATGAGTATTGAGTATTCCCAACGAGAAG                              |
| <b>Oct4-151M_R</b>    | CTTCTCGTTGGGAATACTCAATACTCATTCTTTTGCCTTCTGGCGCC                               |
| <b>Oct4-Link06_F</b>  | CAAGATCGCGGCGCAGGGCCGGAAGAGAAAGCGAACTAGC                                      |
| <b>Oct4-Link06_R</b>  | GGGGCTGCCGCTGGACGAGTCGGCTTCCTCCACCCAC                                         |
| <b>Oct4-7D,22K_F</b>  | CATGAAAGCCCTGCAGGATGAGCTAGAACAGTTTGCCAAGCTGCTGAAGCAGAAGAGGATCAAGTTGGGGTACACCC |
| <b>Oct4-7D,22K_R</b>  | GGGTGTACCCCAACTTGATCCTCTTCTGCTTCAGCAGCTTGGCAAAGTGTCTAGCTCATCCTGCAGGGCTTTCATG  |
| <b>Oct4-21Y,29R_F</b> | GCTGAAGCAGAAGAGGTATACCTTGGGGTACACCCAGGCCCGGGTGGGGCTCACCTGGGGC                 |
| <b>Oct4-21Y,29R_R</b> | CGCCCAGGGTGAGCCCCACCCGGGCTGGGTGTACCCCAAGGTATACCTTCTGCTTCAGC                   |
| <b>Oct6-151S_F</b>    | GCGGCAGAAGGAGAAGCGCTCAACCCCGCGGCCGCGCG                                        |
| <b>Oct6-151S_R</b>    | CGCGCCGCGCGCGGGGTTGAGCGCTTCTCCTTCTGCCGC                                       |
| <b>Oct6-7K,22T_F</b>  | GATGCTCCAGCTCCAAGGACCTGGAGCAGTTCGCCAAGCAGTTCAAGCAACGACGCATCAGCTGGGCTTCA       |
| <b>Oct6-7K,22T_R</b>  | TGAAGCCCAGCGTGATGCGTCGTTGCTTGAAGTCTTGGCGAAGTCTCCAGGTCCTTGGAGCTGGGAGCATC       |
| <b>Oct6-Link04_F</b>  | GAGACCCTGGTGCAGGCCCGCAAGCGCAAGAAGCGC                                          |
| <b>Oct6-Link04_R</b>  | GCATATCTCCTGAAGGTTCTCATTGTTGTGCGGTCTCCTCCAGCCAC                               |
| <b>Oct6-21Y,29R_F</b> | CAAGCAACGACGCTACAAGCTGGGCTTACCCAGGCCCGGTGGACTGGC                              |
| <b>Oct6-21Y,29R_R</b> | GCCAGTCCCACGCGGGCCTGGGTGAAGCCAGCTTGTAGCGTCGTTGCTTG                            |

**APPENDIX SUPPLEMENTARY TABLE S5:**

**SEQUENCES OF PRIMERS FOR GENOTYPING OR qRT-PCR**

| <b>Primer name</b> | <b>Sequence 5'-&gt;3'</b>   |
|--------------------|-----------------------------|
| <b>pMX-Oct4_F</b>  | GTGTGGTGGTACGGGAAA          |
| <b>pMX-Oct4_R</b>  | GGTGAGAAGGCGAAGTCT          |
| <b>pMX-Oct6_F</b>  | CACCACCACACACTGCCCGGCTCTG   |
| <b>pMX-Oct6_R</b>  | CCCTTTTCTGGAGACTAAATAAAAATC |
| <b>pMX-Sox2_F</b>  | GTGTGGTGGTACGGGAAA          |
| <b>pMX-Sox2_R</b>  | TTCAGCTCCGTCTCCATC          |
| <b>pMX-Klf4_F</b>  | GTGTGGTGGTACGGGAAA          |
| <b>pMX-Klf4_R</b>  | CGCGAACGTGGAGAAGGA          |
| <b>pMX-c-Myc_F</b> | TGGTACGGGAAATCACAA          |
| <b>pMX-c-Myc_R</b> | GTCATAGTTCCTGTTGGT          |
| <b>Esrrb_F</b>     | AGGCTCTCATTGGGCCTAGC        |
| <b>Esrrb_R</b>     | ATCCTTGCTGCCACCTGTT         |
| <b>Fgf4_F</b>      | GGGAGGCTACAGACAGCAAG        |
| <b>Fgf4_R</b>      | CTGTGAGCCACCAGACAGAA        |
| <b>Gapdh_F</b>     | CCAATGTGTCCGTCTGGAT         |
| <b>Gapdh_R</b>     | TGCCTGCTCACCACCTTCT         |
| <b>Klf4_F</b>      | TGTGTCGGAGGAAGAGGAAGC       |
| <b>Klf4_R</b>      | ACGACTCACCAAGCACCATCA       |
| <b>Nanog_F</b>     | GAACGGCCAGCCTTGAAT          |
| <b>Nanog_R</b>     | GCAACTGTACGTAAGGCTGCAGAA    |
| <b>Sox2_F</b>      | TTCGAGGAAAGGGTCTTGCTG       |
| <b>Sox2_R</b>      | TCCTTCCTTGTTTGTAACGGTCCT    |
| <b>Rex1_F</b>      | GGCTGCGAGAAGAGCTTTATTCA     |
| <b>Rex1_R</b>      | AGCATTTCTTCCCGCCTTT         |
| <b>Utf1_F</b>      | ACGTGGAGCATCTACGAGGT        |
| <b>Utf1_R</b>      | TAGACTGGGGTTCGTTTCTG        |
| <b>WPRE_F</b>      | TGTTGCCACCTGGATTCTGC        |
| <b>WPRE_R</b>      | AGGAAGTCCGCTGGATTGA         |

## APPENDIX FIGURE LEGENDS

### **Appendix Figure S1. Two Oct4/Oct6 linker alignments result in a different reprogramming efficiency with the Oct4<sup>LinkO6</sup> mutant.**

**A.** Two sequence alignments of POU linker regions of Oct4 and Oct6. On the left, first sequence alignment used by Esch and coworkers [44]. On the right, a structural alignment of the Oct4 and Oct6 linker sequences is shown. In the structural alignment, the entire RK motifs are aligned with a central gap (see Appendix Fig. S1B), thus shifting the position of the first Arg residue in the Oct6 RK motif by one position compared to the sequence based alignment. Prominent residues are highlighted by their number in the sequence.

**B.** Structural model illustrating the difference between Oct4 (green) and Oct6 (orange) RK motifs, which follow the linkers. The “gap” points to the region where Oct4 lacks one positive charge compared with Oct6. This region is also marked by a blue arrow in the structural alignment in panel A of this Figure. Additionally, residue 40 of the POU<sub>s</sub> (Lys in Oct4 and Gln in Oct6) is marked with an asterisk. This residue comes close to the RK region after the linker and adds one positive charge to the construct used in Esch and coworkers [44].

**C.** Comparison of reprogramming efficiencies using WT Oct4 TF and the two Oct4<sup>LinkO6</sup> mutants—first based on the new structural alignment presented here (excluding the Arg residue) and second using the alignment used by Esch and coworkers (including the Arg residue; n=1).

### **Appendix Figure S2. Transgene expression and illustration of colony counting.**

**A.** The relative transcript levels of Oct4 and its mutants were analyzed by qRT-PCR. Viral supernatants from reprogramming experiments performed side-by-side are shown as mean +/- standard deviation (n=2).

**B.** Representative images of GFP-positive colonies (at 2.5x magnification) generated by WT Oct4 and its mutants in combination with Sox2, Klf4, and c-Myc. Colonies were counted 16 days after viral infection, using a fluorescence microscope. GFP signals considered independent colonies are marked with dashed circles. Scale bars: 500  $\mu$ m.

## APPENDIX FIGURES

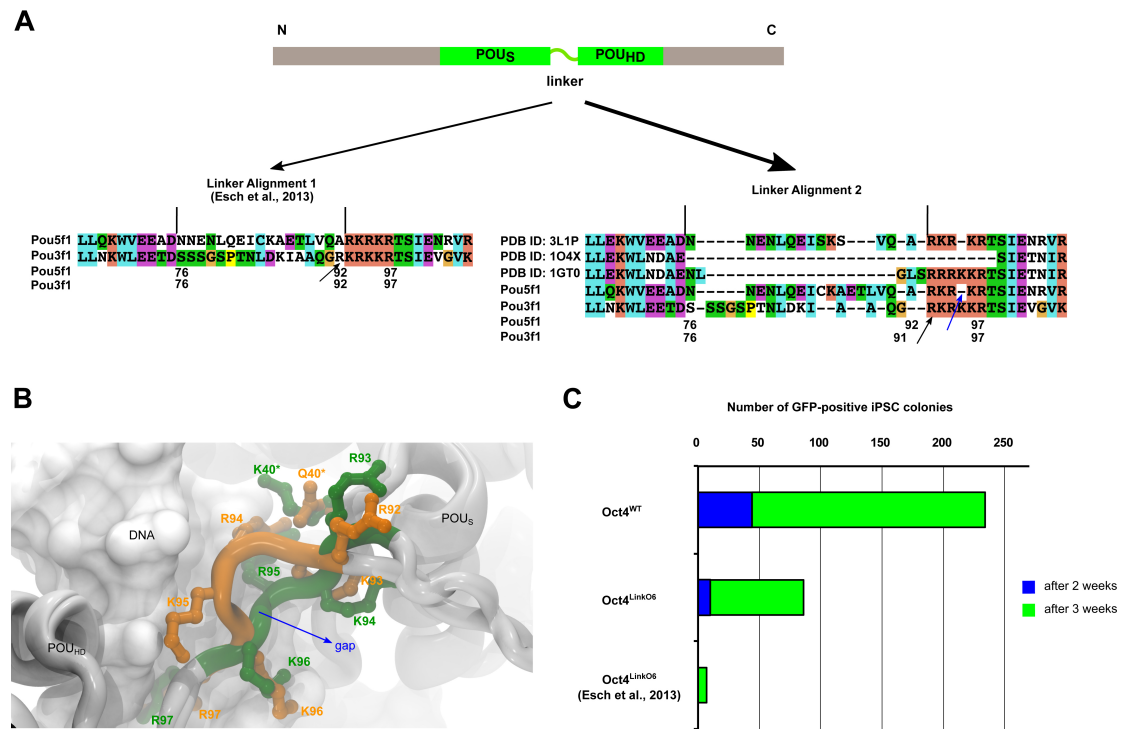

**Appendix Figure S1. Two Oct4/Oct6 linker alignments result in a different reprogramming efficiency with the Oct4<sup>LinkO6</sup> mutant.**



## APPENDIX FIGURES

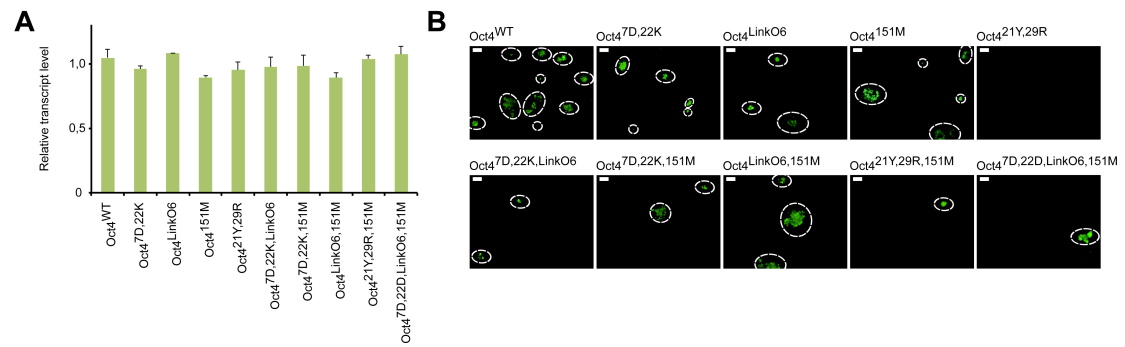

**Appendix Figure S2. Transgene expression and illustration of colony counting.**
