# Supplementary material for: Changing POU dimerization preferences converts Oct6 into a pluripotency inducer
Source: PubMed Central journal article supplement (PMC5286379; doi:10.15252/embr.201642958), 2016-12-22
Supplement: EMBR-18-319-s002.pdf [file EMBR-18-319-s002.pdf]

## Expanded View Figures

### Figure EV1. The POU factor Oct4 exhibits a unique DNA-binding preference.

- A To count the relative abundance of the *OctOct* (*MORE*) versus *SoxOct* motif, the presence of position weight matrices obtained was analyzed using HOMER (lower panel) [39]. References for ChIP-Seq data sets are in order (left to right): Oct2 in B cells [39], Brn2 after 48 h of its overexpression in MEFs [54], Brn2 in NPCs [54], Brn2 in NPCs [55], and Oct4 in ESCs [72]. The upper panel was generated using word searches with IUPAC strings instead of pwms on the same set of ChIPseq peaks as in the lower panel.
- B Representative EMSAs used for omega calculations showing the formation of Oct–Oct homodimers on the *MORE* DNA element for a panel of seven POU proteins. Complexes were separated on native gels and subsequently imaged. Note, in Fig 1E and F, only data for Oct1 but not the closely related Oct11 are shown.
- C Representative EMSAs performed as single-tube reactions containing the Sox2 HMG and POU domains of Oct transcription factors, in combination with Cy5-labeled *SoxOct* and FAM-labeled *MORE* DNA elements. Complexes were separated on native gels and sequentially imaged using FAM and Cy5 channels.
- D Bar plots representing differences in DNA-binding preference as determined by single-tube EMSA reactions for a panel of six POU proteins (classes I–VI) represented as log<sub>2</sub> ratios of hetero- and homodimer band intensities on Cy5-*OctSox* and FAM-*MORE* DNA elements, respectively. Individual data points are shown as gray jitter plot. The mean is shown with standard deviation as error bars ( $n = 9$ ), and Tukey's multiple comparison of means was performed to assess statistical significance ( $***P < 0.001$ ).

Source data are available online for this figure.



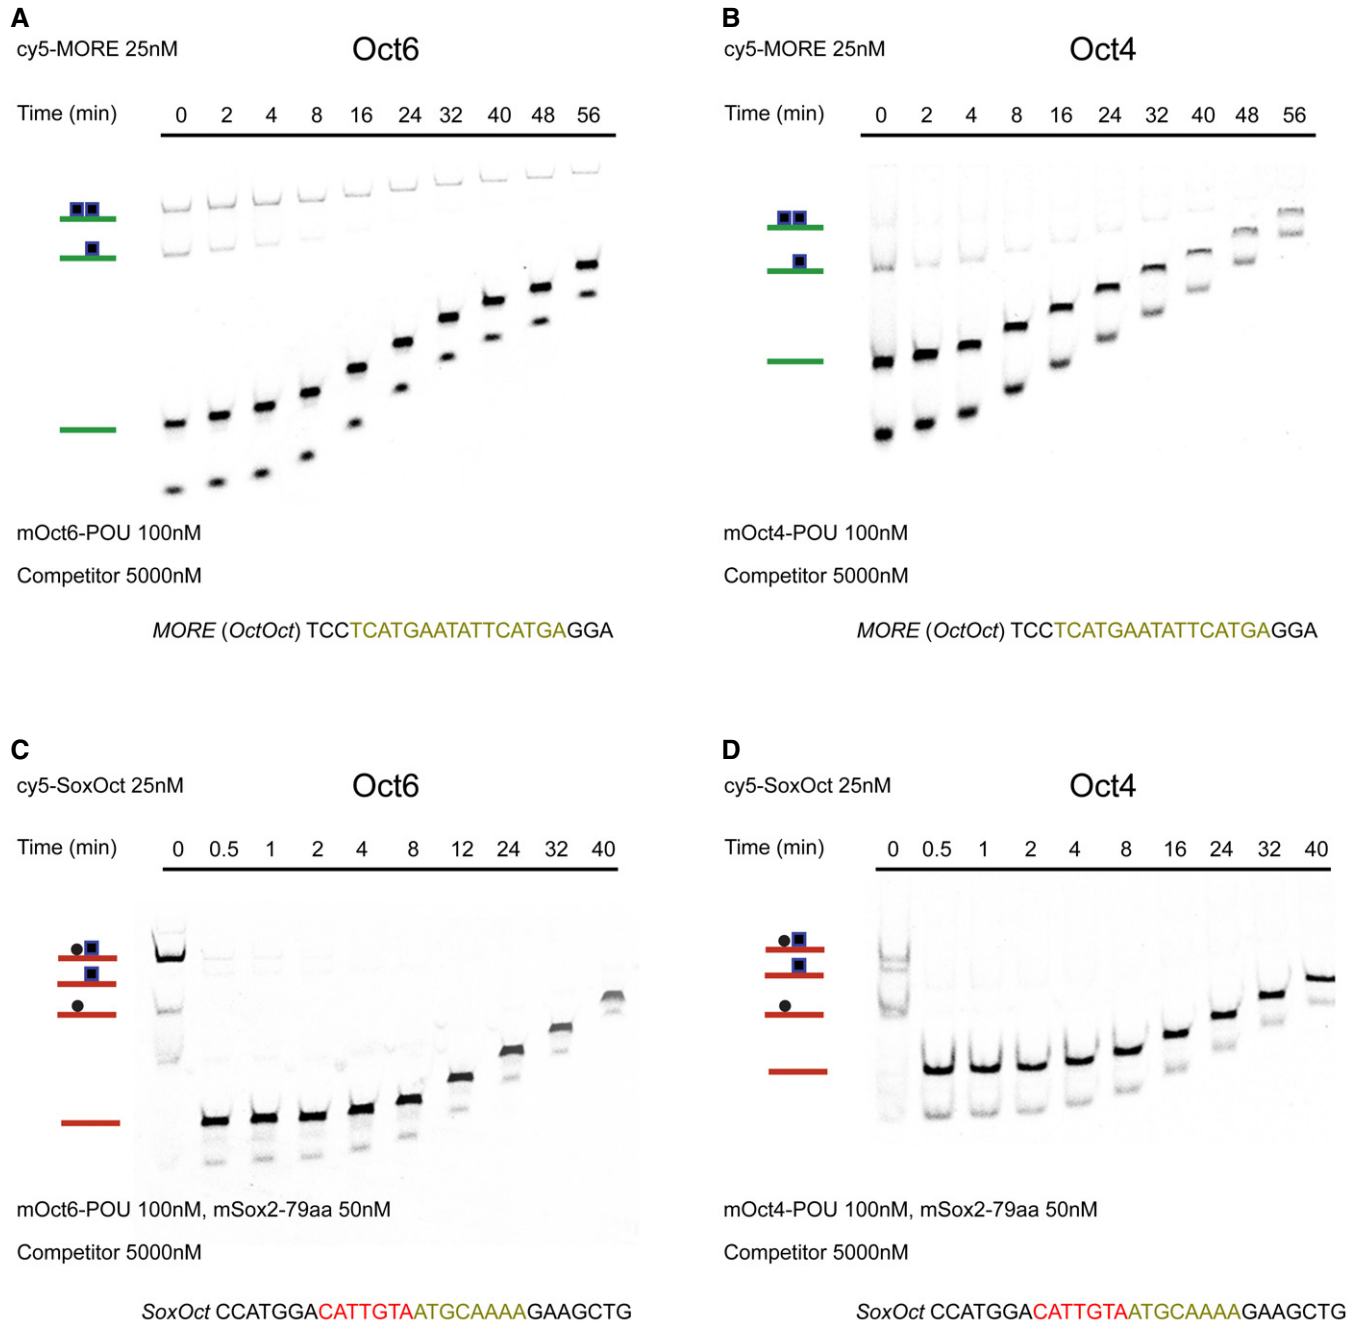

**Figure EV2. Oct6 forms a long-lived homodimer on MORE DNA.**

A–D Off-rate EMSA using the mouse Oct6 POU (A, C) and the mouse Oct4 POU (B, D) along with MORE (A, B) or SoxOct (C, D) DNA elements, respectively. Dissociation was initiated after incubation of proteins with Cy5-labeled DNA for 1 h by the addition of a 200-fold excess of unlabeled competitor DNA of the same sequences as the Cy5-labeled reporter DNA. Reactions were prepared in single tubes and directly loaded onto running gels after indicated time points. Concentrations of the reactants and sequences of the forward DNA strand are mentioned.

**Figure EV3. An exchange of Met and Ser residues in Oct4 and Oct6 POU domains is responsible for different DNA-binding preferences.**

- A Sequence alignment of POU domains of Oct family TFs. POU<sub>S</sub>, the linker region, and POU<sub>HD</sub>, as well as individual helices, are labeled. Notably, this structure-based alignment differs slightly from the one used previously [44], which is explained by a low conservation of residues in the N-terminal part of the POU linker. The alignment was prepared in T-Coffee software and colors distinguish conservation and amino acid residue types. A protein surface interacting with the *MORE* DNA (as shown in [17]) is highlighted. Each of three studied residues (B) is marked by a black asterisk.
- B An overview of tested Oct4 and Oct6 mutants with amino acid exchanges in their POU<sub>HD</sub>. The EMSA below shows the low cooperativity on *MORE* DNA element caused by the mutations. As the single mutation of the 151 site had the same effect as double and triple mutations, the single mutation was selected for further study.
- C Bar plots of EMSA-derived cooperativity factors show different preferences between formation of Oct–Oct homodimers on *MORE* (left) and Sox2–Oct heterodimers on the SoxOct element (right) for WT and mutated forms of Oct4 and Oct6 POU domains. Cooperativity values for WT Oct4 and Oct6 correspond to the values shown in Fig 1E and F and are shown again for comparison with the mutant proteins. The mean is shown with standard deviation as error bars ( $n = 3–13$ ), and Tukey's multiple comparison of means was performed to assess statistical significance ( $***P < 0.001$ ).
- D Representative EMSAs performed in single-tube reactions containing the Sox2 HMG and Oct4<sup>151M</sup> and Oct6<sup>151S</sup> POU domains of Oct transcription factors. Related to the quantification in Fig 2D.

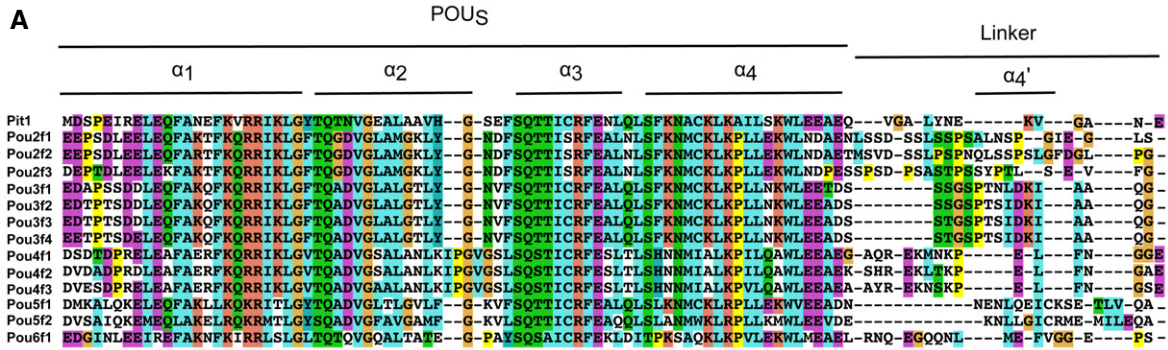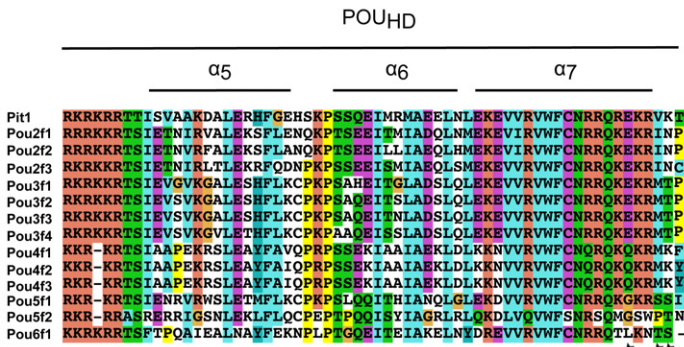

**B**

Oct4<sup>WT</sup> - G148/S151/S152  
 Oct6<sup>WT</sup> - E148/M151/T152  
 Oct6<sup>triple</sup> - G148/S151/S152  
 Oct6<sup>double</sup> - E148/S151/S152  
 Oct6<sup>single</sup> - E148/S151/T152 → Oct4<sup>151S</sup>  
 Oct4<sup>single</sup> - G148/M151/S152 → Oct6<sup>151M</sup>

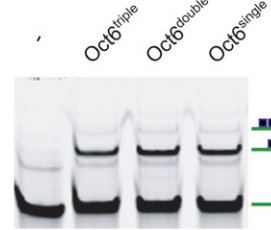

MORE interface (Remenyi et al., 2001)

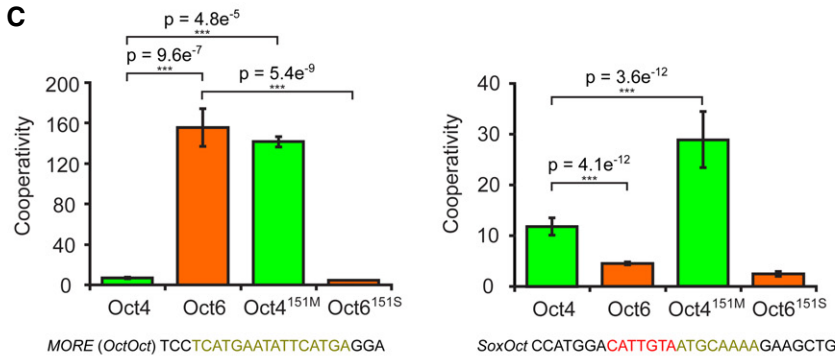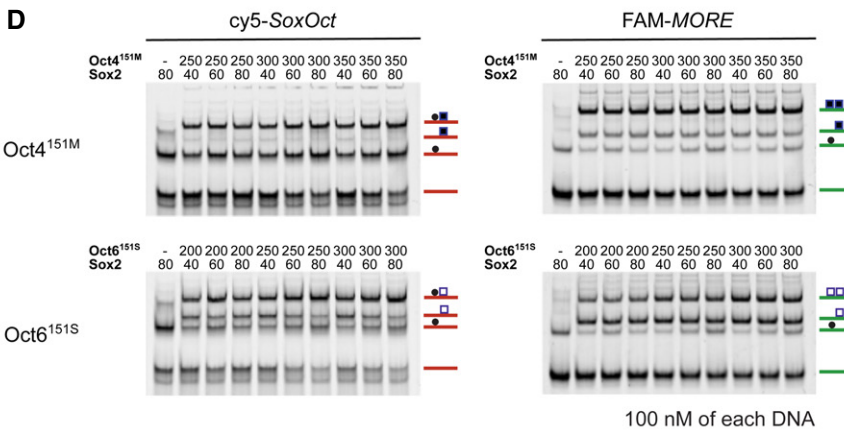

Figure EV3.



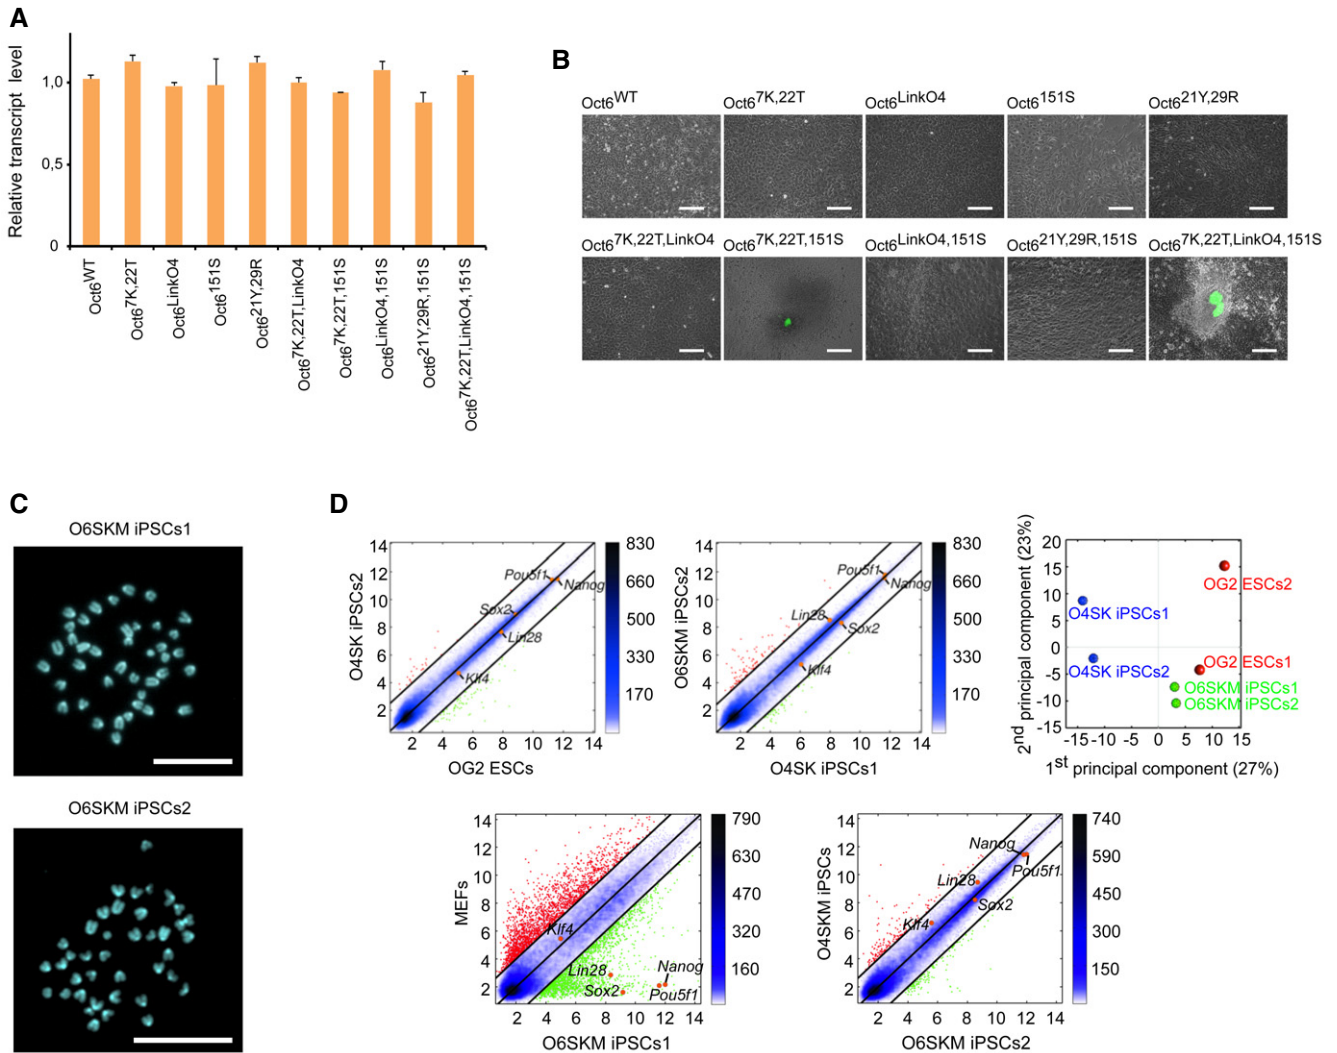

**Figure EV4. O6SKM-induced pluripotent cells have normal karyotype and global gene expression profile, similar to embryonic stem cells.**

- A The relative transcript levels of Oct6 and its mutants were analyzed by qRT-PCR. The mean values for biological replicates using viral supernatants from same reprogramming experiments are shown with the standard deviation as error bars ( $n = 2$ ).
- B Oct4-GFP-positive colonies of mouse iPSCs generated by Oct6 mutants in combination with Sox2, Klf4, and c-Myc. Colonies were imaged 16 days after viral infection, using a fluorescence microscope. Scale bars: 250  $\mu$ m.
- C Karyotyping of two stable mouse O6SKM iPSC lines revealed that cells from both lines carry the correct number of chromosomes—40. Scale bars: 20  $\mu$ m.
- D Pairwise scatter plots comparing global gene expression profiles of O6SKM iPSC lines with OG2 ESCs, O4SK iPSCs, and previously published O4SKM iPSCs and MEFs. Black lines represent a twofold change in gene expression levels between the paired cell lines. On the right side of the plots, color bar indicates scattering density. Red and green dots represent up- and downregulated genes, respectively. Positions of selected pluripotency-related genes are highlighted as orange points. Principal component analysis highlighting the close relationship between global gene expression profiles of O6SKM iPSCs (green circles), OG2 ESCs (red circles), and O4SK iPSCs (blue circles) is shown in the upper right corner.

**Figure EV5. Cells reprogrammed using the synthetic Oct6 molecule show pluripotency *in vivo*.**

- A Sections of teratomas stained 4 weeks after subcutaneous injection of nude mice with iPSCs generated using O6SKM factors. Teratomas contain all three embryonic germ layers: endoderm (epithelium, e), mesoderm (muscle, m), and ectoderm (keratin, k, and neural epithelium with rosettes, n). Scale bars: 100  $\mu$ m.
- B Oct4-GFP-positive germ cells were detected in the male fetal gonads of E13.5 embryos, confirming the germline contribution of O6SKM iPSCs. Scale bars: 100  $\mu$ m.
- C Oct4-GFP-positive germ cells were detected in the gonads of E19.5 pups. Scale bars: 250  $\mu$ m.
- D Representative example of two chimeric mice generated by O6SKM iPSCs. The agouti coat color originated from O6SKM iPSCs. These two chimeras represent mice numbers 13 and 14 (see genotyping results below).
- E PCR analysis of DNA isolated from the tails of chimeric mice was performed in order to demonstrate germline contribution by the presence of Oct4-GFP (OG2) and Oct6 viral transgenes. Contamination by Oct4 virus was also excluded by PCR analysis; M stands for DNA marker, ctrl (+) refers to positive iPSC control, and ctrl (–) refers to negative MEF control. Samples 1–14 refer to O6SKM iPSCs2; samples 15–20 refer to O6SKM iPSCs1. Samples labeled with “X” are not relevant to this study.
- F Genotyping of Oct4-GFP-positive pups after germline transmission confirmed the presence of Oct6 viral transgene. M stands for DNA marker. Two GFP-negative mice were used as negative controls (ctrl1 and ctrl2).
- G The Oct4 complementation assay using ZHBTc4 embryonic stem cells was performed as was described previously [68]. Oct4 and engineered Oct6 transgenes were used to rescue the ES cells upon loss of endogenous Oct4 after the addition of doxycycline (Tc, tetracycline antibiotics) and thus maintain pluripotency. Scale bars: 250  $\mu$ m.
- H The relative transcript levels of selected pluripotency markers and also of relative lentiviral levels of WT Oct4 and engineered Oct6 were analyzed by qRT-PCR. The mean values are shown with the standard deviation as error bars ( $n = 2$ ).

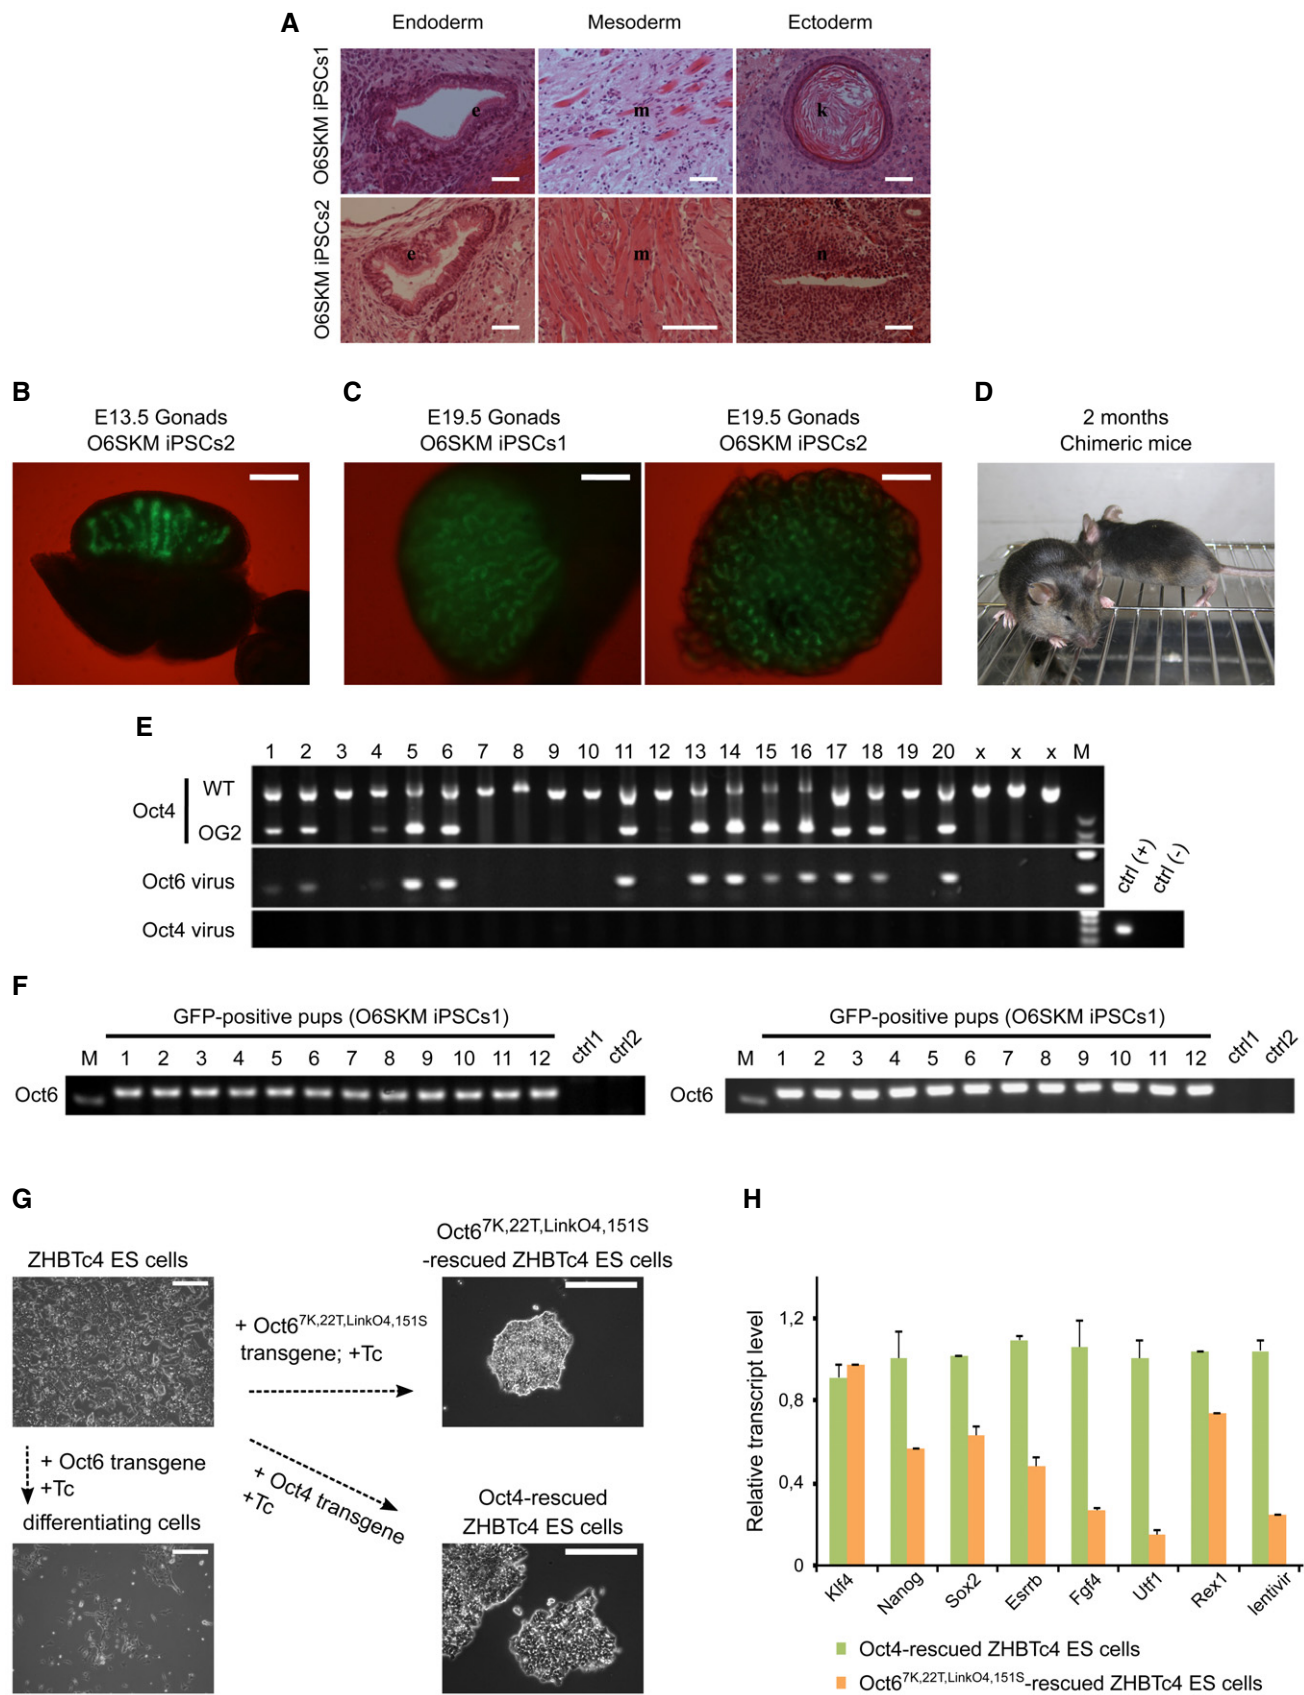

Figure EV5.
