# Supplementary material for: Changing POU dimerization preferences converts Oct6 into a pluripotency inducer
Source: PubMed Central journal article supplement (PMC5286379; doi:10.15252/embr.201642958), 2016-12-22
Supplement: EMBR-18-319-s008.pdf [file EMBR-18-319-s008.pdf]

Manuscript EMBO-2016-42958

## **Changing POU dimerization preferences converts Oct6 into a pluripotency inducer**

Stepan Jerabek, Calista K. L. Ng, Guangming Wu, Marcos J. Arauzo-Bravo, Kee-Pyo Kim, Daniel Esch, Vikas Malik, Yanpu Chen, Sergiy Velychko, Caitlin M. MacCarthy, Xiaoxiao Yang, Vlad Cojocaru, Hans R. Schöler, and Ralf Jauch

*Corresponding authors: Hans R. Schöler, Max Planck Institute for Molecular Biomedicine; Ralf Jauch, Guangzhou Institutes for Biomedicine and Health, Chinese Academy of Sciences*

---

### **Review timeline:**

|                     |                  |
|---------------------|------------------|
| Submission Date:    | 26 June 2016     |
| Editorial Decision: | 15 July 2016     |
| Revision Received:  | 13 October 2016  |
| Editorial Decision: | 25 October 2016  |
| Revision Received:  | 02 November 2016 |
| Accepted:           | 08 November 2016 |

---

Editor: Achim Breiling

### **Transaction Report:**

(Note: With the exception of the correction of typographical or spelling errors that could be a source of ambiguity, letters and reports are not edited. The original formatting of letters and referee reports may not be reflected in this compilation.)

---

1st Editorial Decision

15 July 2016

Thank you for the submission of your research manuscript to EMBO reports. We have now received reports from the three referees that were asked to evaluate your study, which can be found at the end of this email.

As you will see, all referees acknowledge the high interest of the findings and support publication of the study. However, referee #2 has raised several concerns that I ask you to fully address in a complete point-by-point response. Acceptance of your manuscript will depend on a positive outcome of a second round of review. It is EMBO reports policy to allow a single round of revision only and acceptance or rejection of the manuscript will therefore depend on the completeness of your responses included in the next, final version of the manuscript.

Revised manuscripts should be submitted within three months of a request for revision; they will otherwise be treated as new submissions. Please contact us if a 3-months time frame is not sufficient for the revisions so that we can discuss the revisions further.

## REFeree REPORTS

**Referee #1:**

The manuscript by Jerabek et al., reports a detailed study aimed at identifying molecular features defining functional specificity distinguishing Oct4 and Oct6. In this study, the authors first provide a series of experiments showing that Oct4 and POU somatic factors exhibit intrinsic preference for binding to SoxOct or MORE elements respectively. Based on structural models they demonstrate that the predicted Ser151 and the corresponding Met151 are crucial to allow Oct4 and Oct6 binding sequence specificity.

Then the authors identified Oct4 "elements" required for efficient induction of pluripotency. Through the generation of a battery of mutants, the authors identify specific aminoacids or the POU linker domain as relevant for efficient induction of pluripotency. Then since Oct6 cannot induce pluripotency, the authors analyze whether replacement of Oct4 elements into Oct6 are sufficient to convert Oct6 into a pluripotency inducing factor.

This experiment shows that the four elements together enabled Oct6 to induce pluripotency. In the last part of the study the authors demonstrate that Oct6 mutant iPSCs are genuine iPSCs. I consider this as an important study precisely addressing functional features defining binding specificity of POU factors as well as Oct4 -dependent inducing pluripotency ability. In addition the experiments are logic and well designed. In sum I support the publication of this manuscript in EMBO Reports.

**Referee #2:**

This paper presents an interesting study of the molecular determinants of Oct TFs' pluripotency-inducing capability in terms of their different propensities for the homodimeric or heterodimeric forms. The authors found that a single point mutation is sufficient to shift the equilibrium position between the two forms, and when combined with two more mutations could turn Oct6 into a pluripotency inducer. The biological significance of the discovery, as the authors rightly pointed out, lies in the fact that "subtle modifications at the molecular interfaces... can profoundly swap their lineage specifying activities." Overall, the data presented are convincing, and the discoveries of significance to the field of stem cell biology, reprogramming and TF biology. It would be important if the authors could address these points:

1) The study falls a little short on deeper mechanistic investigation behind the remarkable equilibrium-altering capability of this single-point mutation. Given that the mutation, which is a major result in this study, was discovered based on careful analysis of structural information, it would be more convincing if the authors could again show or refer to structural data to validate their finding, i.e. show that the S151M or M151S mutation on Oct4 or Oct6 indeed leads to significant structural changes at the contact site with POUHD, thereby elucidating the mechanistic basis for the changes in affinity of the TFs for the homo- or heterodimeric form. The same could be said for the 7K/22T double mutation.

2) While the authors have demonstrated that changing the dimerization preferences of Oct TFs can alter their lineage-specifying capability, one could not help but wonder if dimerization represents the whole picture. Could the rate of dimer formation or the time during which they stay in the homo- or heterodimeric form also contribute to their pluripotency-inducing capability? Such possibilities need to be examined or discussed.

3) Page 5: Please explain what is special about 'HOMER', and why is it capable of discovering previously hidden features from publically available ChIP-Seq datasets?

4) Page 6: The cooperativities of the 6 POU TFs are quantified "using previously derived equations". More details are needed here to justify the analysis. Also, do the "cooperativity" values shown in Fig 1D and E refer to the Hill coefficient? If so, the values of 100-250 as reported in Fig

1D seems way too high... Moreover, the values in Fig 1E are more than 1 order of magnitude smaller than those in 1D. For the same TF to exhibit such drastic changes in cooperativity seems highly unusual, leading to questions on the validity of such quantitative analysis.

5) Fig 3B and C: The validity of the quantification here rests solely on the accurate counting of MEF colonies, but judging from the images shown in Fig 3C, this does not seem as straightforward as it sounds, since how one defines a "colony" in such images could at times be rather arbitrary. For example, how many colonies are there in the Oct4WT image? And for Oct4151M, is there 1 or 3 colonies? The authors need to provide details to demonstrate that such counting is done in an accurate and unbiased fashion.

6) Fig 4A: The 7K/22T mutation introduced here seems very abrupt, since it was not tested in the previous Figure and has not been mentioned before. How did this mutation come about? And why are the amino acids K and T chosen for these two positions?

7) There are multiple issues with phrasing and wording, grammar, labeling, spelling, unclear expression, etc. For example:

The first sentence of Introduction begins with the word "already", which is grammatically awkward

In Fig 2A legend: "...Oct-Oct (left) and Oct6-Oct6 (right)". I assume it should read "(top) and (bottom)"? Each subpanel should be clearly labeled in the Figure to make it easier for the reader. The same applies to Figs 1B and 3A.

Fig 4E: In label "DNA (Dapi)", DAPI should be capitalized throughout

The beginning of the Abstract gives no background, and thus seems very abrupt. The reference list uses a different font from the main text.

-----

**Referee #3:**

This is a phenomenal manuscript dissecting with unprecedented detail and elegance residues dictating pro-pluripotency dictating ability of Oct4 vs Oct6 transcription factors. Not only the authors were able to hamper Oct4 pro-pluripotency ability with a single mutation, but they "Reprogrammed" Oct6 to become a pro-pluripotency factor and generate high quality iPSCs. The rational leading the authors to make this discovery pinpoint OctSox dimer ability as key determinant for pro-pluripotency function of Pou family members of TFs. The manuscript is well written, the figures are elegant and fully support the conclusions made. Methods are detailed, and references are adequate and unbiased. I have no comments on how to further improve this outstanding work.

1st Revision - authors' response

13 October 2016

**Referee #1:**

The manuscript by Jerabek et al., reports a detailed study aimed at identifying molecular features defining functional specificity distinguishing Oct4 and Oct6. In this study, the authors first provide a series of experiments showing that Oct4 and POU somatic factors exhibit intrinsic preference for binding to SoxOct or MORE elements respectively. Based on structural models they demonstrate that the predicted Ser151 and the corresponding Met151 are crucial to allow Oct4 and Oct6 binding sequence specificity.

Then the authors identified Oct4 "elements" required for efficient induction of pluripotency. Through the generation of a battery of mutants, the authors identify specific aminoacids or the POU linker domain as relevant for efficient induction of pluripotency. Then since Oct6 cannot induce pluripotency, the authors analyze whether replacement of Oct4 elements into Oct6 are sufficient to convert Oct6 into a pluripotency inducing factor.

This experiment shows that the four elements together enabled Oct6 to induce pluripotency. In the last part of the study the authors demonstrate that Oct6 mutant iPSCs are genuine iPSCs.

I consider this as an important study precisely addressing functional features defining binding specificity of POU factors as well as Oct4 -dependent inducing pluripotency ability. In addition the experiments are logic and well designed. In sum I support the publication of this manuscript in EMBO Reports.

*Response: We thank the reviewer for his/her positive assessment of our manuscript.*

-----

## **Referee #2:**

This paper presents an interesting study of the molecular determinants of Oct TFs' pluripotency-inducing capability in terms of their different propensities for the homodimeric or heterodimeric forms. The authors found that a single point mutation is sufficient to shift the equilibrium position between the two forms, and when combined with two more mutations could turn Oct6 into a pluripotency inducer. The biological significance of the discovery, as the authors rightly pointed out, lies in the fact that "subtle modifications at the molecular interfaces... can profoundly swap their lineage specifying activities." Overall, the data presented are convincing, and the discoveries of significance to the field of stem cell biology, reprogramming and TF biology. It would be important if the authors could address these points:

1) The study falls a little short on deeper mechanistic investigation behind the remarkable equilibrium-altering capability of this single-point mutation. Given that the mutation, which is a major result in this study, was discovered based on careful analysis of structural information, it would be more convincing if the authors could again show or refer to structural data to validate their finding, i.e. show that the S151M or M151S mutation on Oct4 or Oct6 indeed leads to significant structural changes at the contact site with POUHD, thereby elucidating the mechanistic basis for the changes in affinity of the TFs for the homo- or heterodimeric form. The same could be said for the 7K/22T double mutation.

*Response: We thank the reviewer for this comment. To further understand the mechanism by which M151 in Oct6 and S151 in Oct4 affect the homodimerization, we performed classical molecular dynamics simulations for the Oct4 and Oct6, homodimers on MORE DNA. For each homodimer, we performed 3 independent simulations, each of which was 200 ns long, starting with three different initial models obtained from homology modeling (in total 600 ns per system). The models differed in the linker conformation which is unknown for the MORE-bound configuration. We observed significant differences between Oct4 and Oct6 both in terms of global dynamics as well as regarding the detailed structural environment of the residue 151. These differences provide further explanations on why the homodimer interface in Oct4 is less optimal than in Oct6. Because the residues surrounding residue 151 are very well conserved between Oct4 and Oct6, simulations of the mutants are unlikely to bring further insights. Therefore, and also considering that simulations are time consuming and computationally expensive, we limited ourselves to simulations of the wild types. The results are now shown in new panels in main Fig. 1G and Fig. 2B, 2C.*

*We agree with the reviewer that it would be fantastic to also explain the mechanism by which residues K7 and T22 function. However, investigating the structures and simulations available (from this study and from our previous studies by Merino et al. 2014 [1] and Merino et al. 2015 [2]) we cannot draw clear conclusions on how these residues contribute to the function of Oct4. T22 is close to the Oct-Sox interface but does not have a major contribution to the interaction, whereas K7 is at the beginning of helix 1 of the POU<sub>S</sub> domain without being involved in any known interaction of Oct4. Therefore, further studies will be needed to clarify the role of these residues.*

*We describe the data in a new paragraph in the Results section pages 6 and 7 "2. The Oct4 homodimer is unstable and structurally flexible", with relevant Fig. 1G, Fig. 2B and 2C. Materials and Methods sections named "Molecular dynamics simulations", "Building structural models of DNA-bound Oct4 and Oct6 homodimers", "System preparation for MD simulations." and "MD simulations" relate to the new chapter, as well as Appendix Table 2 and 3.*

2) While the authors have demonstrated that changing the dimerization preferences of Oct TFs can alter their lineage-specifying capability, one could not help but wonder if dimerization represents the whole picture. Could the rate of dimer formation or the time during which they stay in the homo- or heterodimeric form also contribute to their pluripotency-inducing capability? Such possibilities need to be examined or discussed.

*Response: We agree that not only equilibrium binding determines the regulatory outcome of a TF-DNA interaction. Rather, the binding kinetics of TF-DNA interactions can be of critical importance. As suggested by the reviewer we examined the “time during which they [the TFs] stay in homo- or heterodimeric form” using newly designed time-resolved competition EMSAs. Indeed, these experiments reveal profound differences in the dissociation kinetics between Oct4 and Oct6. We show the new set of experiments in Fig. EV2 and describe the kinetics EMSAs along with the MD experiments in a new paragraph on pages 6 and 7 entitled: “2. The Oct4 homodimer is unstable and structurally flexible”.*

3) Page 5: Please explain what is special about 'HOMER', and why is it capable of discovering previously hidden features from publically available ChIP-Seq datasets?

*Response: We thank the reviewer for pointing out that we could mislead readers by overemphasizing that only the HOMER software could detect the MORE motif. In the revised version, in addition to the position weight matrix scanning approach, we performed an additional word search using IUPAC strings which gave the same results (enrichment of the MORE motif in POU sites in somatic cells and enrichment of the SoxOct motif in ESCs). We have added this alternative way to detect enriched sequences to Fig. EV1A. In sum, we believe previous studies have not reported the MORE for three main and related reasons:*

- (i) Matching de novo motif finding results with known motif databases do not provide unambiguous results with default settings.*
- (ii) Investigators have not specifically looked for the MORE and did not notice cryptic versions of the MORE.*
- (iii) Without instructing de novo motif-finding software to search for longer composite motifs the MORE is not clearly detectable.*

*The MORE sequence can escape detection without using longer motif length option (-len 12,14,16 while the HOMER default motif length is -len 8,10,12) during de novo motif finding. For example, a shortened version of MORE is by default reported as Pit1 motif using the HOMER ‘known motif’ function which compares motifs discovered de novo with known motifs deposited in databases such as JASPAR (Fig. 1A; MEFs 48hrs in Brn2 shows shorter version of MORE while in mNPCs shows the full version of MORE). Hence, motif discovery software will not automatically refer investigators to the MORE even if MORE-like sequences are discovered de novo. In fact, some of the publications reporting data we have re-analyzed do in fact report degenerate and shortened versions of the MORE but authors do not refer to it as such. For example, in Wapinski et al. [4], the authors do show a different form of MORE motif in Fig. 4A as a Brn2 motif in NPCs but due to its ambiguity it is referred to as “POU-like motif” in the main text. Further, in Lodato et al. [5] the MORE motif was shown alongside other POU motifs in supplementary table 7 (sheet no.2, row 22<sup>nd</sup>) and only octamer motif was represented in Fig. 3B. Those are not mistakes made by the authors of these studies but caused by the subtleties of the differences in the binding elements. The first 8bp of the 12bp MORE has a strong resemblance to the canonical octamer leading which may lead to its classification as simple octamer rather than a MORE (octamer: ATGCAAAT; MORE: ATGCATATGCAT). If the sequences retrieved by de novo motif finding are too short, the difference between MORE and the canonical octamer will be barely detectable.*

*Therefore, we obtain the best results by instructing HOMER to search for motifs of a certain length (options -len 12,14,16). Moreover, knowledge of the older biochemical and crystallographic such as Tomilin et al. [6] is necessary to appreciate the MORE sequence. Whilst the difference between the octamer motif and the first 8bp of the MORE appears subtle, it leads to a profound change in the configuration of the protein-DNA complex (monomeric POU versus a homodimeric POU, Fig. 1B, 1C). Lastly, the presence of the MORE versus SoxOct needs to be validated by careful motif*

scanning analysis or searches with dedicated IUPAC strings (Fig. EV1A). We now modify the text of the first paragraph of the Results section (page 5. "To investigate ...").

4) Page 6: The cooperativities of the 6 POU TFs are quantified "using previously derived equations". More details are needed here to justify the analysis. Also, do the "cooperativity" values shown in Fig 1D and E refer to the Hill coefficient? If so, the values of 100-250 as reported in Fig 1D seems way too high... Moreover, the values in Fig 1E are more than 1 order of magnitude smaller than those in 1D. For the same TF to exhibit such drastic changes in cooperativity seems highly unusual, leading to questions on the validity of such quantitative analysis.

*Response: We include a more detailed description how we to quantitate the cooperativity constant omega and include the equation used in an expanded methods section page 17. We do not use the hill coefficient but equilibrium ratios of equilibrium binding constants, which can be inferred directly from the relative abundance of the possible microstates (free DNA, monomerically bound DNA and dimerically bound DNA). These states can be directly measured by densitometric evaluation of bands visible in EMSA gels. The equations were derived previously in collaboration with the mathematician Shyam Prabhakar (Genome Institute of Singapore) using principles of statistical mechanics. The formalism for heterodimeric binding was published by Ng et al. [7] and for homodimeric binding by Baburajendran et al. [8]. Gary Stormo (Washington University) adopted these equations for high throughput approaches to measure TF cooperativity using deep sequencing. Here, microstates in EMSA gels are quantified by counting sequencing reads rather than by measuring band intensities (Stormo et al. [9]). Likewise, a group using microfluidics devices to study the dimerization of nuclear receptors has adopted our equations (Isakova et al. [10]). Further, an increase of the binding constant by several orders of magnitude is well within the range of what others and we have observed previously for other TF dimers. In fact, a recent study on nuclear receptors reported w values significantly higher than ours (Isakova et al. [10]). The homodimer cooperativity for Pit1, Oct1, Oct6 and Brn2 is indeed one order of magnitude higher (Fig. 1D) than their respective heterodimer cooperativity (Fig. 1E). This observation finds further support in our kinetic EMSA assays (new Fig. EV2) demonstrating that the homodimeric complexes are substantially more stable than the heterodimeric complexes.*

5) Fig 3B and C: The validity of the quantification here rests solely on the accurate counting of MEF colonies, but judging from the images shown in Fig 3C, this does not seem as straightforward as it sounds, since how one defines a "colony" in such images could at times be rather arbitrary. For example, how many colonies are there in the Oct4WT image? And for Oct4151M, is there 1 or 3 colonies? The authors need to provide details to demonstrate that such counting is done in an accurate and unbiased fashion.

*Response: In order to show typical GFP-positive colonies generated by our mutants, in Fig. 3D we used the 10x magnification on the fluorescence microscope. However, when we count colonies, we normally rely on a lower magnification to 2 or 2.5x magnification, which allows us to distinguish colonies more clearly from 'longer distance'. Therefore, we now add a new illustrative Appendix Fig. S2B taken with 2.5x lenses that we routinely use for iPSC colony counting. In this setup, one can distinguish a colony by: i) clear spatial separation of the GFP signal and/or ii) morphology of the colony (occasionally, a physical shape of colony in the bright field is helpful if two colonies are too close to each other). Moreover, in the new figure, we indicated counted colonies with dashed white circles. We still like to retain the previous higher magnification images (10x lense) in the main text in Fig. 3D, as it better illustrates the morphology of the colonies. Furthermore, we included an additional replicate to the revised Fig. 3C which now shows the mean +/- standard deviation of three biological replicates and we also performed ANOVA to assess the significance. Last, we included the quantification of all viral titers used in our study, as determined by qRT-PCR. As comparison of reprogramming efficiencies between different mutants may be influenced by relative amount of their viruses in the supernatants, the new Appendix Fig. S2A and Fig. EV4A shows that we used comparable amount of viruses among screened Oct4 and Oct6 mutants.*

6) Fig 4A: The 7K/22T mutation introduced here seems very abrupt, since it was not tested in the previous Figure and has not been mentioned before. How did this mutation come about? And why are the amino acids K and T chosen for these two positions?

*Response: We wish to point out that this mutant had been characterized in the previous Fig. 3C in the context of Oct4 as well. Nishimoto et al. [11] had identified this mutation as being critical for the maintenance of pluripotency using the Oct4 complementation assays. In the new version of our manuscript, we also perform and present complementation assay (Fig. EV5G, EV5H) as a support that engineered Oct6 can maintain pluripotency of ES cells. Furthermore, we cite Nishimoto's work on several occasions. In the previous paragraph describing mutations introduced in Oct4, we had mentioned that (page 9): "...we chose a double mutant in the first alpha helix of the Oct4 POU<sub>5</sub> subdomain (Oct4<sup>7D,22K</sup>) previously shown to be required for maintaining pluripotency [9]." We now rephrase and add a further citation to the Nishimoto's study when we describe the engineering of Oct6 (page 10): "However, when 151S was combined with the 7K, 22T double mutant identified by Nishimoto et al [9] to be critical for pluripotency maintenance, we consistently obtained iPSC colonies (Fig. 4A, Fig. EV4A, EV4B)."*

7) There are multiple issues with phrasing and wording, grammar, labeling, spelling, unclear expression, etc.

*Response: We carefully revised the whole text and made several minor typographical and grammar corrections.*

The first sentence of Introduction begins with the word "already," which is grammatically awkward.

*Response: We improved the first sentence in the beginning of our Introduction part and now write (page 3): "In 2006, somatic cells were shown to be reprogrammable to pluripotent stem cells by the overexpression of just four transcription factors (TFs)—Oct4, Sox2, Klf4, and c-Myc (OSKM) [10]."*

In Fig 2A legend: "...Oct-Oct (left) and Oct6-Oct6 (right)". I assume it should read "(top) and (bottom)"? Each subpanel should be clearly labeled in the Figure to make it easier for the reader. The same applies to Figs 1B and 3A.

*Response: Now, we present a new Fig. 2 containing data from molecular simulations (please see our response to the second point of Reviewer #2). We carefully labeled all sub-figures, so the orientation is easy and without any confusion.*

Fig 4E: In label "DNA (Dapi)," DAPI should be capitalized throughout

*Response: We corrected the label and put the abbreviation of 4',6-diamidino-2-phenylindole -- DAPI -- in capital letters throughout the new version of our manuscript.*

The beginning of the Abstract gives no background, and thus seems very abrupt.

*Response: We revised our Abstract which now starts with two introductory sentences and believe its readability has improved*

The reference list uses a different font from the main text.

*Response: We changed the style of text and made the font unified across the re-submitted manuscript.*

**Referee #3:**

This is a phenomenal manuscript dissecting with unprecedented detail and elegance residues dictating pro-pluripotency dictating ability of Oct4 vs Oct6 transcription factors. Not only the authors were able to hamper Oct4 pro-pluripotency ability with a single mutation, but they "Reprogrammed" Oct6 to become a pro-pluripotency factor and generate high quality iPSCs. The rational leading the authors to make this discovery pinpoint OctSox dimer ability as key determinant for pro-pluripotency function of Pou family members of TFs. The manuscript is well written, the figures are elegant and fully support the conclusions made. Methods are detailed, and references are adequate and unbiased. I have no comments on how to further improve this outstanding work.

*Response: We are grateful for the encouraging comments of the reviewer.*

## REFERENCES

1. Merino F, Ng CK, Veerapandian V, Scholer HR, Jauch R, Cojocaru V (2014) Structural basis for the SOX-dependent genomic redistribution of OCT4 in stem cell differentiation. *Structure* 22: 1274-86
2. Merino F, Bouvier B, Cojocaru V (2015) Cooperative DNA Recognition Modulated by an Interplay between Protein-Protein Interactions and DNA-Mediated Allostery. *PLoS Comput Biol* 11: e1004287
3. Lickwar CR, Mueller F, Hanlon SE, McNally JG, Lieb JD (2012) Genome-wide protein-DNA binding dynamics suggest a molecular clutch for transcription factor function. *Nature* 484: 251-5
4. Wapinski OL, Vierbuchen T, Qu K, Lee QY, Chanda S, Fuentes DR, Giresi PG, Ng YH, Marro S, Neff NF, *et al.* (2013) Hierarchical mechanisms for direct reprogramming of fibroblasts to neurons. *Cell* 155: 621-35
5. Lodato MA, Ng CW, Wamstad JA, Cheng AW, Thai KK, Fraenkel E, Jaenisch R, Boyer LA (2013) SOX2 co-occupies distal enhancer elements with distinct POU factors in ESCs and NPCs to specify cell state. *PLoS Genet* 9: e1003288
6. Tomilin A, Remenyi A, Lins K, Bak H, Leidel S, Vriend G, Wilmanns M, Scholer HR (2000) Synergism with the coactivator OBF-1 (OCA-B, BOB-1) is mediated by a specific POU dimer configuration. *Cell* 103: 853-64
7. Ng CK, Li NX, Chee S, Prabhakar S, Kolatkar PR, Jauch R (2012) Deciphering the Sox-Oct partner code by quantitative cooperativity measurements. *Nucleic Acids Res* 40: 4933-41
8. BabuRajendran N, Palasingam P, Narasimhan K, Sun W, Prabhakar S, Jauch R, Kolatkar PR (2010) Structure of Smad1 MH1/DNA complex reveals distinctive rearrangements of BMP and TGF-beta effectors. *Nucleic Acids Res* 38: 3477-88
9. Stormo GD, Zuo Z, Chang YK (2015) Spec-seq: determining protein-DNA-binding specificity by sequencing. *Brief Funct Genomics* 14: 30-8
10. Isakova A, Berset Y, Hatzimanikatis V, Deplancke B (2016) Quantification of Cooperativity in Heterodimer-DNA Binding Improves the Accuracy of Binding Specificity Models. *J Biol Chem* 291: 10293-306
11. Nishimoto M, Miyagi S, Yamagishi T, Sakaguchi T, Niwa H, Muramatsu M, Okuda A (2005) Oct-3/4 maintains the proliferative embryonic stem cell state via specific binding to a variant octamer sequence in the regulatory region of the UTF1 locus. *Mol Cell Biol* 25: 5084-94

2nd Editorial Decision

25 October 2016

Thank you for the submission of your revised manuscript to our editorial offices. We have now received the report from the referee that was asked to re-evaluate your study (you will find enclosed below). As you will see, s/he supports now the publication of your manuscript in EMBO reports. Before we can proceed with formal acceptance, I have a few editorial requests that you need to address in a final revised version of the manuscript.

Please provide for the final version high resolution versions of all main and EV figures in TIFF or EPS format. The current pdf files show compression artifacts and are also rather small.

Further, all materials and methods should be included in the main manuscript file. Therefore please add those from the Appendix to the main manuscript. Maybe this part could also be shortened significantly. Finally, please correct the typo in the TOC of the Appendix (it should be "table of contents").

#### REFEREE REPORTS

-----

##### **Referee #2:**

The authors made appropriate attempts to address each of the points raised. The time-resolved EMSA served their purpose in addressing all remaining concerns. I fully support publication of this study.

2nd Revision - authors' response

02 November 2016

Authors made the requested changes and submitted updated files as needed.

3rd Editorial Decision

08 November 2016

I am very pleased to accept your manuscript for publication in the next available issue of EMBO reports. Thank you for your contribution to our journal.

YOU MUST COMPLETE ALL CELLS WITH A PINK BACKGROUND

PLEASE NOTE THAT THIS CHECKLIST WILL BE PUBLISHED ALONGSIDE YOUR PAPER

|                                       |
|---------------------------------------|
| Corresponding Author Name: Ralf Jauch |
| Journal Submitted to: EMBO Reports    |
| Manuscript Number: EMBOR-2016-42958-T |

**Reporting Checklist for Life Sciences Articles (Rev. July 2015)**

This checklist is used to ensure good reporting standards and to improve the reproducibility of published results. These guidelines are consistent with the Principles and Guidelines for Reporting Preclinical Research issued by the NIH in 2014. Please follow the journal's authorship guidelines in preparing your manuscript.

**A- Figures****1. Data****The data shown in figures should satisfy the following conditions:**

- the data were obtained and processed according to the field's best practice and are presented to reflect the results of the experiments in an accurate and unbiased manner.
- figure panels include only data points, measurements or observations that can be compared to each other in a scientifically meaningful way.
- graphs include clearly labeled error bars for independent experiments and sample sizes. Unless justified, error bars should not be shown for technical replicates.
- if n < 5, the individual data points from each experiment should be plotted and any statistical test employed should be justified
- Source Data should be included to report the data underlying graphs. Please follow the guidelines set out in the author ship guidelines on Data Presentation.

**2. Captions****Each figure caption should contain the following information, for each panel where they are relevant:**

- a specification of the experimental system investigated (eg cell line, species name).
- the assay(s) and method(s) used to carry out the reported observations and measurements
- an explicit mention of the biological and chemical entity(ies) that are being measured.
- an explicit mention of the biological and chemical entity(ies) that are altered/ varied/ perturbed in a controlled manner.
- the exact sample size (n) for each experimental group/condition, given as a number, not a range;
- a description of the sample collection allowing the reader to understand whether the samples represent technical or biological replicates (including how many animals, litters, cultures, etc.).
- a statement of how many times the experiment shown was independently replicated in the laboratory.
- definitions of statistical methods and measures:
  - common tests, such as t-test (please specify whether paired vs. unpaired), simple  $\chi^2$  tests, Wilcoxon and Mann-Whitney tests, can be unambiguously identified by name only, but more complex techniques should be described in the methods section;
  - are tests one-sided or two-sided?
  - are there adjustments for multiple comparisons?
  - exact statistical test results, e.g., P values < x but not P values < x;
  - definition of 'center values' as median or average;
  - definition of error bars as s.d. or s.e.m.

Any descriptions too long for the figure legend should be included in the methods section and/or with the source data.

Please ensure that the answers to the following questions are reported in the manuscript itself. We encourage you to include a specific subsection in the methods section for statistics, reagents, animal models and human subjects.

In the pink boxes below, provide the page number(s) of the manuscript draft or figure legend(s) where the information can be located. Every question should be answered. If the question is not relevant to your research, please write NA (non applicable).

**USEFUL LINKS FOR COMPLETING THIS FORM**

|                                                                                                                                                                                             |                                                         |
|---------------------------------------------------------------------------------------------------------------------------------------------------------------------------------------------|---------------------------------------------------------|
| <a href="http://www.antibodypedia.com">http://www.antibodypedia.com</a>                                                                                                                     | Antibodypedia                                           |
| <a href="http://1degreebio.org">http://1degreebio.org</a>                                                                                                                                   | 1DegreeBio                                              |
| <a href="http://www.equator-network.org/reporting-guidelines/improving-bioscience-research-repo">http://www.equator-network.org/reporting-guidelines/improving-bioscience-research-repo</a> | ARRIVE Guidelines                                       |
| <a href="http://grants.nih.gov/grants/olaw/olaw.htm">http://grants.nih.gov/grants/olaw/olaw.htm</a>                                                                                         | NIH Guidelines in animal use                            |
| <a href="http://www.mrc.ac.uk/Ourresearch/Ethicsresearchguidance/Useofanimals/index.htm">http://www.mrc.ac.uk/Ourresearch/Ethicsresearchguidance/Useofanimals/index.htm</a>                 | MRC Guidelines on animal use                            |
| <a href="http://ClinicalTrials.gov">http://ClinicalTrials.gov</a>                                                                                                                           | Clinical Trial registration                             |
| <a href="http://www.consort-statement.org">http://www.consort-statement.org</a>                                                                                                             | CONSORT Flow Diagram                                    |
| <a href="http://www.consort-statement.org/checklists/view/32-consort/66-title">http://www.consort-statement.org/checklists/view/32-consort/66-title</a>                                     | CONSORT Check List                                      |
| <a href="http://www.equator-network.org/reporting-guidelines/reporting-recommendations-for-tur">http://www.equator-network.org/reporting-guidelines/reporting-recommendations-for-tur</a>   | REMARK Reporting Guidelines (marker prognostic studies) |
| <a href="http://datadryad.org">http://datadryad.org</a>                                                                                                                                     | Dryad                                                   |
| <a href="http://figshare.com">http://figshare.com</a>                                                                                                                                       | Figshare                                                |
| <a href="http://www.ncbi.nlm.nih.gov/gap">http://www.ncbi.nlm.nih.gov/gap</a>                                                                                                               | dbGAP                                                   |
| <a href="http://www.ebi.ac.uk/ega">http://www.ebi.ac.uk/ega</a>                                                                                                                             | EGA                                                     |
| <a href="http://biomodels.net/">http://biomodels.net/</a>                                                                                                                                   | Biomodels Database                                      |
| <a href="http://biomodels.net/miriam/">http://biomodels.net/miriam/</a>                                                                                                                     | MIRIAM Guidelines                                       |
| <a href="http://jill.biochem.sun.ac.za">http://jill.biochem.sun.ac.za</a>                                                                                                                   | JWS Online                                              |
| <a href="http://oba.od.nih.gov/biosecurity/biosecurity_documents.html">http://oba.od.nih.gov/biosecurity/biosecurity_documents.html</a>                                                     | Biosecurity Documents from NIH                          |
| <a href="http://www.selectagents.gov/">http://www.selectagents.gov/</a>                                                                                                                     | List of Select Agents                                   |

**B- Statistics and general methods**

Please fill out these boxes (Do not worry if you cannot see all your text once you press return)

|                                                                                                                                                                                         |                                                                                                                                                                                                                                               |
|-----------------------------------------------------------------------------------------------------------------------------------------------------------------------------------------|-----------------------------------------------------------------------------------------------------------------------------------------------------------------------------------------------------------------------------------------------|
| 1.a. How was the sample size chosen to ensure adequate power to detect a pre-specified effect size?                                                                                     | Regarding EMSAs and generation of induced pluripotent stem cells, we performed our experiments at least in triplicates to ensure that our measurements are robust and we can formulate our conclusions based on the results.                  |
| 1.b. For animal studies, include a statement about sample size estimate even if no statistical methods were used.                                                                       | NA - Our work doesn't belong into the animal studies and therefore no statistical methods were needed for sample size estimation.                                                                                                             |
| 2. Describe inclusion/exclusion criteria if samples or animals were excluded from the analysis. Were the criteria pre-established?                                                      | We didn't apply any selection of data before analysis.                                                                                                                                                                                        |
| 3. Were any steps taken to minimize the effects of subjective bias when allocating animals/samples to treatment (e.g. randomization procedure)? If yes, please describe.                | We performed our experiments independently and according to the standard procedures as described in our Materials and Methods. Regarding EMSAs and iPSC generation, the results were independently successfully reproduced by our colleagues. |
| For animal studies, include a statement about randomization even if no randomization was used.                                                                                          | NA - No randomization was used in our study.                                                                                                                                                                                                  |
| 4.a. Were any steps taken to minimize the effects of subjective bias during group allocation or/and when assessing results (e.g. blinding of the investigator)? If yes please describe. | The interpretation of results obtained in our study doesn't require any specific step to decrease the bias of the investigator. As was mentioned above, several key results were successfully reproduced in our labs.                         |
| 4.b. For animal studies, include a statement about blinding even if no blinding was done                                                                                                | NA - No blinding was performed in our study.                                                                                                                                                                                                  |
| 5. For every figure, are statistical tests justified as appropriate?                                                                                                                    | Yes. In our manuscript, Tukey multiple comparison of means and ANOVA were used for assessment of statistical significances. Statistical results are stated in the text of our manuscript or in the Figures.                                   |
| Do the data meet the assumptions of the tests (e.g., normal distribution)? Describe any methods used to assess it.                                                                      | quantile-quantile plots were performed                                                                                                                                                                                                        |
| Is there an estimate of variation within each group of data?                                                                                                                            | We performed our experiments in independent replicates and statistically assessed the obtained data.                                                                                                                                          |
| Is the variance similar between the groups that are being statistically compared?                                                                                                       | Yes. We only compared groups with similar variations.                                                                                                                                                                                         |

**C- Reagents**

|                                                                                                                                                                                                                                                                                                                              |                                                                                                                                                                                                                                                                                                                                                                                                                                                                                                                                                                                                                                                       |
|------------------------------------------------------------------------------------------------------------------------------------------------------------------------------------------------------------------------------------------------------------------------------------------------------------------------------|-------------------------------------------------------------------------------------------------------------------------------------------------------------------------------------------------------------------------------------------------------------------------------------------------------------------------------------------------------------------------------------------------------------------------------------------------------------------------------------------------------------------------------------------------------------------------------------------------------------------------------------------------------|
| 6. To show that antibodies were profiled for use in the system under study (assay and species), provide a citation, catalog number and/or clone number, supplementary information or reference to an antibody validation profile. e.g., Antibodypedia (see link list at top right), 1DegreeBio (see link list at top right). | We specified all antibodies which we used in our study. The specification is in the Materials and Methods section of our manuscript. As we wrote in the Immunochimistry part: "Primary antibodies—goat polyclonal anti-Sox2 (1:17; Santa Cruz; 1:400), rat monoclonal anti-Nanog (eBioscience; 1:1,000), mouse monoclonal anti-smooth muscle actin (SMA)(Sigma-Aldrich; 1:500), goat polyclonal anti- $\alpha$ -fetoprotein (AFP)(C-19; Santa Cruz; 1:400), mouse monoclonal anti- $\beta$ -tubulin III (Sigma-Aldrich; 1:800) —, Alexa Fluor 568, 647; Fluorophore-conjugated secondary antibodies (Invitrogen) were diluted 1:1,000 in 1% BSA/PBS." |
| 7. Identify the source of cell lines and report if they were recently authenticated (e.g., by STR profiling) and tested for mycoplasma contamination.                                                                                                                                                                        | For the reprogramming assay, DG2 mouse fibroblasts were prepared in the Max Planck Institute for Molecular Biomedicine, where they are regularly tested for mycoplasma contamination according to the standard operation procedures.                                                                                                                                                                                                                                                                                                                                                                                                                  |

\* For all hyperlinks, please see the table at the top right of the document

**D- Animal Models**

|                                                                                                                                                                                                                                                                                                                                                                                    |                                                                                                                                                                                                                                                                                                                                                                                                                                                                                    |
|------------------------------------------------------------------------------------------------------------------------------------------------------------------------------------------------------------------------------------------------------------------------------------------------------------------------------------------------------------------------------------|------------------------------------------------------------------------------------------------------------------------------------------------------------------------------------------------------------------------------------------------------------------------------------------------------------------------------------------------------------------------------------------------------------------------------------------------------------------------------------|
| 8. Report species, strain, gender, age of animals and genetic modification status where applicable. Please detail housing and husbandry conditions and the source of animals.                                                                                                                                                                                                      | SCID mice (NOD.CB17-Prkdcscid/J) are homozygous for the severe combined immune deficiency spontaneous mutation Prkdcscid. DG2 mice (B6.CBA-Tg(Pou5f1-EGFP2Mmn)/J) carries an EGFP-reporter transgene under the control of the Oct4 promoter and distal enhancer. Both strains were purchased from Jax and maintained in the Max Planck Institute (MPI) animal facility under the supervision of a certified veterinarian in charge of the facility. 2-4 months old mice were used. |
| 9. For experiments involving live vertebrates, include a statement of compliance with ethical regulations and identify the committee(s) approving the experiments.                                                                                                                                                                                                                 | A protocol for animal handling and maintenance for this study was approved by the Landesamt für Natur, Umwelt und Verbraucherschutz Nordrhein-Westfalen (LANUV NRW).                                                                                                                                                                                                                                                                                                               |
| 10. We recommend consulting the ARRIVE guidelines (see link list at top right) (PLoS Biol. 8(6), e1000412, 2010) to ensure that other relevant aspects of animal studies are adequately reported. See author guidelines, under 'Reporting Guidelines'. See also: NIH (see link list at top right) and MRC (see link list at top right) recommendations. Please confirm compliance. | The mice used in the present experiments were maintained in our animal facility in compliance with MRC recommendation.                                                                                                                                                                                                                                                                                                                                                             |

**E- Human Subjects**

|                                                             |    |
|-------------------------------------------------------------|----|
| 11. Identify the committee(s) approving the study protocol. | NA |
|-------------------------------------------------------------|----|

|                                                                                                                                                                                                                                                                                                                    |    |
|--------------------------------------------------------------------------------------------------------------------------------------------------------------------------------------------------------------------------------------------------------------------------------------------------------------------|----|
| 12. Include a statement confirming that informed consent was obtained from all subjects and that the experiments conformed to the principles set out in the WMA Declaration of Helsinki and the Department of Health and Human Services Belmont Report.                                                            | NA |
| 13. For publication of patient photos, include a statement confirming that consent to publish was obtained.                                                                                                                                                                                                        | NA |
| 14. Report any restrictions on the availability (and/or on the use) of human data or samples.                                                                                                                                                                                                                      | NA |
| 15. Report the clinical trial registration number (at ClinicalTrials.gov or equivalent), where applicable.                                                                                                                                                                                                         | NA |
| 16. For phase II and III randomized controlled trials, please refer to the CONSORT flow diagram (see link list at top right) and submit the CONSORT checklist (see link list at top right) with your submission. See author guidelines, under 'Reporting Guidelines'. Please confirm you have submitted this list. | NA |
| 17. For tumor marker prognostic studies, we recommend that you follow the REMARK reporting guidelines (see link list at top right). See author guidelines, under 'Reporting Guidelines'. Please confirm you have followed these guidelines.                                                                        | NA |

#### F- Data Accessibility

|                                                                                                                                                                                                                                                                                                                                                                                                                                                                                                                                                                                                                                                                                                  |                                                                                                                                                                                                                                                                                                                                                                                                                                                                                                                                                                                                                                                                                                                                                                                                                                                                                                                                                                                                                                                                                                                                                                                                                                                                                                                                                                                                                                                                                                                                                                                                                                                                                                                                                                                  |
|--------------------------------------------------------------------------------------------------------------------------------------------------------------------------------------------------------------------------------------------------------------------------------------------------------------------------------------------------------------------------------------------------------------------------------------------------------------------------------------------------------------------------------------------------------------------------------------------------------------------------------------------------------------------------------------------------|----------------------------------------------------------------------------------------------------------------------------------------------------------------------------------------------------------------------------------------------------------------------------------------------------------------------------------------------------------------------------------------------------------------------------------------------------------------------------------------------------------------------------------------------------------------------------------------------------------------------------------------------------------------------------------------------------------------------------------------------------------------------------------------------------------------------------------------------------------------------------------------------------------------------------------------------------------------------------------------------------------------------------------------------------------------------------------------------------------------------------------------------------------------------------------------------------------------------------------------------------------------------------------------------------------------------------------------------------------------------------------------------------------------------------------------------------------------------------------------------------------------------------------------------------------------------------------------------------------------------------------------------------------------------------------------------------------------------------------------------------------------------------------|
| 18. Provide accession codes for deposited data. See author guidelines, under 'Data Deposition'.                                                                                                                                                                                                                                                                                                                                                                                                                                                                                                                                                                                                  | We deposited our microarray data set as stated on page 22 of the manuscript: "The data discussed in this publication have been deposited in NCBI's Gene Expression Omnibus [69] and are accessible through GEO Series accession number GSE81908 ( <a href="https://www.ncbi.nlm.nih.gov/geo/query/acc.cgi?acc=GSE81908">https://www.ncbi.nlm.nih.gov/geo/query/acc.cgi?acc=GSE81908</a> )."                                                                                                                                                                                                                                                                                                                                                                                                                                                                                                                                                                                                                                                                                                                                                                                                                                                                                                                                                                                                                                                                                                                                                                                                                                                                                                                                                                                      |
| Data deposition in a public repository is mandatory for:<br>a. Protein, DNA and RNA sequences<br>b. Macromolecular structures<br>c. Crystallographic data for small molecules<br>d. Functional genomics data<br>e. Proteomics and molecular interactions                                                                                                                                                                                                                                                                                                                                                                                                                                         |                                                                                                                                                                                                                                                                                                                                                                                                                                                                                                                                                                                                                                                                                                                                                                                                                                                                                                                                                                                                                                                                                                                                                                                                                                                                                                                                                                                                                                                                                                                                                                                                                                                                                                                                                                                  |
| 19. Deposition is strongly recommended for any datasets that are central and integral to the study, please consider the journal's data policy. If no structured public repository exists for a given data type, we encourage the provision of datasets in the manuscript as a Supplementary Document (see author guidelines under 'Expanded View' or in unstructured repositories such as Dryad (see link list at top right) or Figshare (see link list at top right).                                                                                                                                                                                                                           | As stated above, we deposited our microarray data set.                                                                                                                                                                                                                                                                                                                                                                                                                                                                                                                                                                                                                                                                                                                                                                                                                                                                                                                                                                                                                                                                                                                                                                                                                                                                                                                                                                                                                                                                                                                                                                                                                                                                                                                           |
| 20. Access to human clinical and genomic datasets should be provided with as few restrictions as possible while respecting ethical obligations to the patients and relevant medical and legal issues. If practically possible and compatible with the individual consent agreement used in the study, such data should be deposited in one of the major public access-controlled repositories such as dbGAP (see link list at top right) or EGA (see link list at top right).                                                                                                                                                                                                                    | NA                                                                                                                                                                                                                                                                                                                                                                                                                                                                                                                                                                                                                                                                                                                                                                                                                                                                                                                                                                                                                                                                                                                                                                                                                                                                                                                                                                                                                                                                                                                                                                                                                                                                                                                                                                               |
| 21. As far as possible, primary and referenced data should be formally cited in a Data Availability section. Please state whether you have included this section.<br><br>Examples:<br><b>Primary Data</b><br>Wetmore KM, Deutschbauer AM, Price MN, Arkin AP (2012) Comparison of gene expression and mutant fitness in <i>Shewanella oneidensis</i> MR-1. Gene Expression Omnibus GSE39462<br><b>Referenced Data</b><br>Huang J, Brown AF, Lei M (2012). Crystal structure of the TRBD domain of TERT and the CRA/5 of TR. Protein Data Bank 4026<br>AP-MS analysis of human histone deacetylase interactions in CEM-T cells (2013). PRIDE PXD000208                                            | The included sections "Primary Data" and "Referenced Data" in the Data Availability part of our ms., according to the given example. Find a copy of Data Availability (pg 25-26) below. Primary Data: Stephan Jerabek, Calisto K. J. Ng, Guangming Wu, Marcos J. Arauzo-Bravo, Kee-Pyo Kim, Daniel Esch, Vikas Malik, Yanqiu Chen, Sergiy Velychko, Caitlin MacCarthy, Xiaoxiao Yang, Viad Cojocaru, Hans R. Schöler and Ralf Jauch (2016) Changing POU dimerization preferences converts Oct6 into a pluripotency inducer. Gene Expression Omnibus GSE81908 / Referenced Data: Heintz S, Benner C, Spann N, Bertolino E, Lin YC, Laslo P, Cheng JX, Murne C, Singh N, Glass CK (2010) Simple Combinations of Lineage-Determining Transcription Factors Prime cis-Regulatory Elements Required for Macrophage and B Cell Identities. Gene Expression Omnibus GSE21512; Wapinski OL, Vierbuchen T, Du K, Lee CY, Chandra S, Fuentes DR, Grest PG, Ng JH, Mani S, Neff NF, Drechsel D, Maruyama B, Castro DS, Webb AE, Sudhof TC, Brunet A, Guilleminot F, Chang HY, Wernig M (2013) Hierarchical mechanisms for direct reprogramming of fibroblasts to neurons. Gene Expression Omnibus GSE43916; Lodato MA, Ng CW, Wamstad JA, Cheng AW, Thai KK, Fraenkel E, Jaenisch R, Boyer LA (2013) SOX2 co-occupies distal enhancer elements with distinct POU factors in ESCs and NPCs to specify cell state. Gene Expression Omnibus GSE35496; Marson A, Levine SS, Cole MF, Frampton GM, Brambrink T, Johnstone S, Guenther MG, Johnston WK, Wernig M, Newman J, Calabrese JM, Dennis LM, Volkert TL, Gupta S, Love J, Hannett N, Sharp PA, Bartel DP, Jaenisch R, Young RA (2008) Connecting microRNA genes to the core transcriptional regulatory circuitry of embryonic stem cells. |
| 21. (continued).                                                                                                                                                                                                                                                                                                                                                                                                                                                                                                                                                                                                                                                                                 | Gene Expression Omnibus GSE11724; Remyeni A, Tomlin A, Pahl E, Liss K, Philippson A, Reinbold R, Schöler HR, Wilmanns M (2001) Differential dimer activities of the transcription factor Oct-1 by DNA-induced interface swapping. Protein Data Bank 1E30; Remyeni A, Liss K, Nissen LJ, Reinbold R, Schöler HR, Wilmanns M (2003) Crystal structure of a POU/HMG/DNA ternary complex suggests differential assembly of Oct4 and Sox2 on two enhancers. Protein Data Bank 1G70; Jauch R, Choo SH, Ng CK, Kolatkar PR (2011) Crystal structure of the dimeric Oct6 (Pou3f1) POU domain bound to palindromic MORE DNA. Protein Data Bank 2XSD; Esch D, Vahokoski J, Groves MR, Pogenberg V, Cojocaru V, Vom Bruch H, Han D, Dresler HC, Arauzo-Bravo MJ, Ng CK, Jauch R, Wilmanns M, Schöler HR (2013) A unique Oct4 interface is crucial for reprogramming to pluripotency. Protein Data Bank 3L1P                                                                                                                                                                                                                                                                                                                                                                                                                                                                                                                                                                                                                                                                                                                                                                                                                                                                                 |
| 22. Computational models that are central and integral to a study should be shared without restrictions and provided in a machine-readable form. The relevant accession numbers or links should be provided. When possible, standardized format (SBML, CellML) should be used instead of scripts (e.g. MATLAB). Authors are strongly encouraged to follow the MIRIAM guidelines (see link list at top right) and deposit their model in a public database such as Biomedels (see link list at top right) or JWS Online (see link list at top right). If computer source code is provided with the paper, it should be deposited in a public repository or included in supplementary information. | We describe structural models and molecular dynamics simulations as integral part of this study. To our knowledge, there is no common repository or database to deposit such data on the public domain. If considered important, we are happy to make these data available through our website.                                                                                                                                                                                                                                                                                                                                                                                                                                                                                                                                                                                                                                                                                                                                                                                                                                                                                                                                                                                                                                                                                                                                                                                                                                                                                                                                                                                                                                                                                  |

#### G- Dual use research of concern

|                                                                                                                                                                                                                                                                                                |                                                                                                                           |
|------------------------------------------------------------------------------------------------------------------------------------------------------------------------------------------------------------------------------------------------------------------------------------------------|---------------------------------------------------------------------------------------------------------------------------|
| 23. Could your study fall under dual use research restrictions? Please check biosecurity documents (see link list at top right) and list of select agents and toxins (APHIS/CDC) (see link list at top right). According to your biosecurity guidelines, provide a statement only if it could. | No. Our research cannot be directly misapplied to pose a significant threat with negative consequences for broad society. |
|------------------------------------------------------------------------------------------------------------------------------------------------------------------------------------------------------------------------------------------------------------------------------------------------|---------------------------------------------------------------------------------------------------------------------------|
